# Supplementary material for: FOXK1 and FOXK2 regulate aerobic glycolysis
Source: Springer Nature journal article supplement (doi:10.1038/s41586-019-0900-5), 2019-01-30

## Extended Data Figure 1a

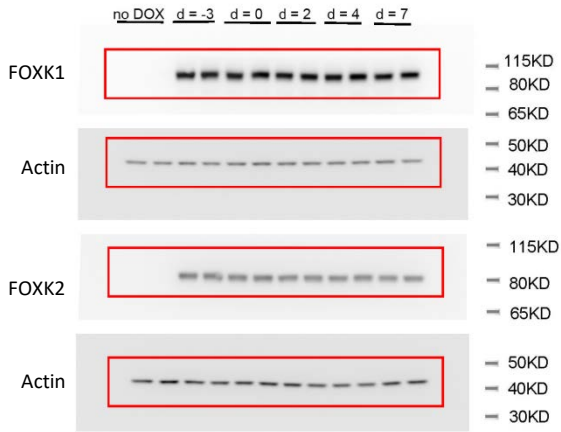

## Extended Data Figure 1f

### 1. Glut4

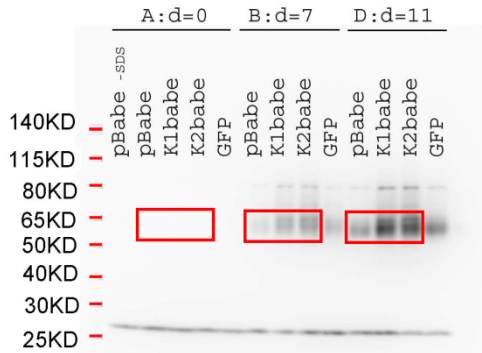

### 2. Glut1

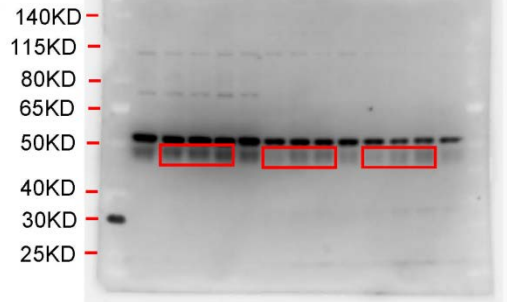

### 3. Actin

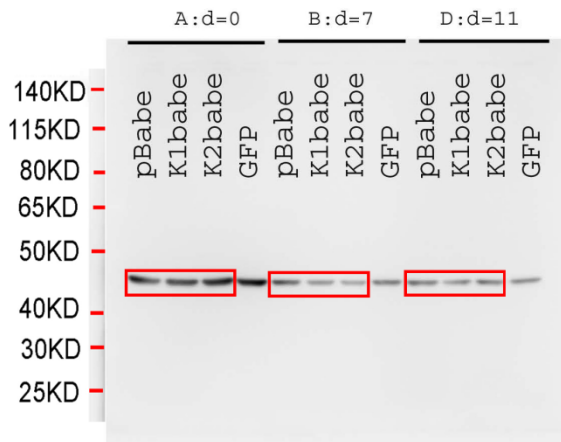

### 4. a-Flag

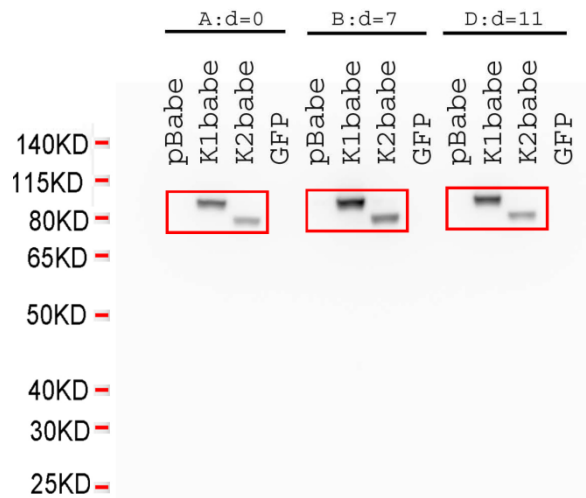

# Extended Data Figure 3a

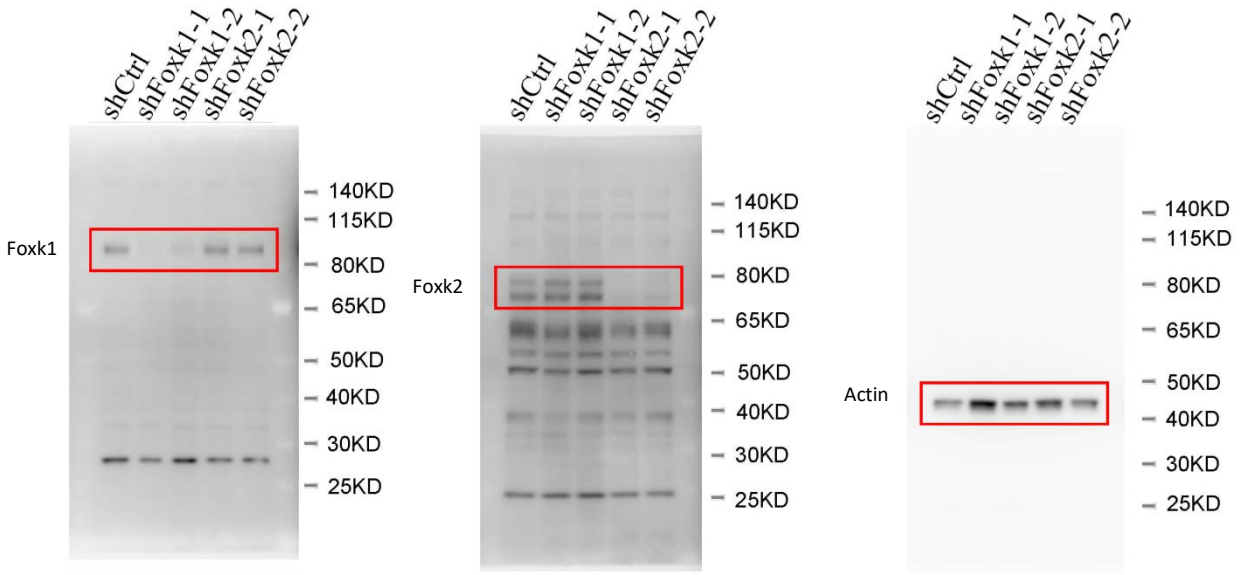

# Extended Data Figure 5a

Blot image is merged with molecular weight

Hk2

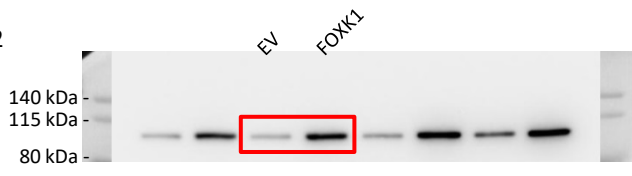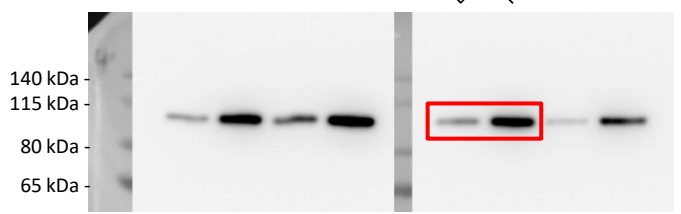

Middle part of membrane was used for Pdk4 WB

Cyc B

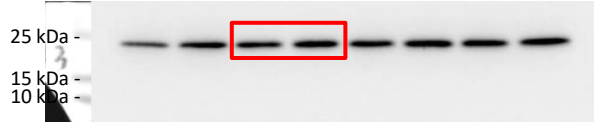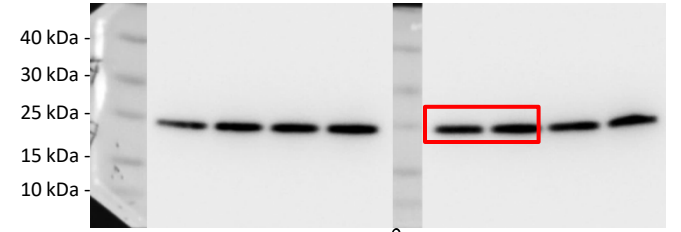

Hk2

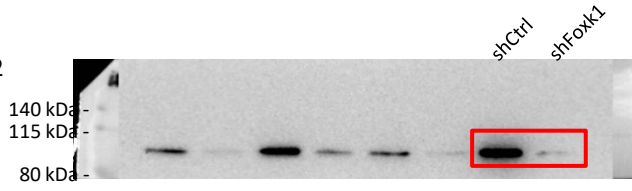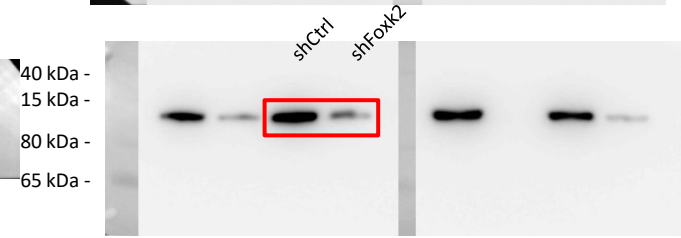

Cyc B

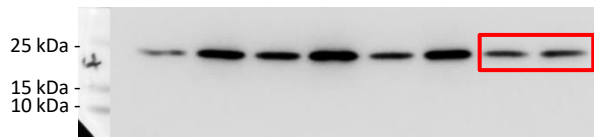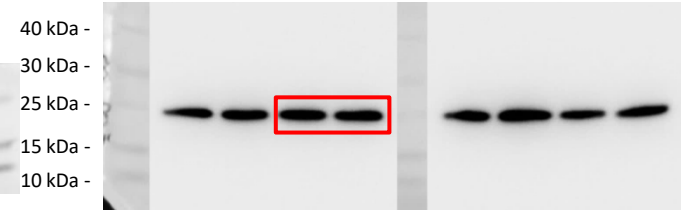

# Extended Data Figure 5b

Blot image is merged with molecular weight

Pfkm

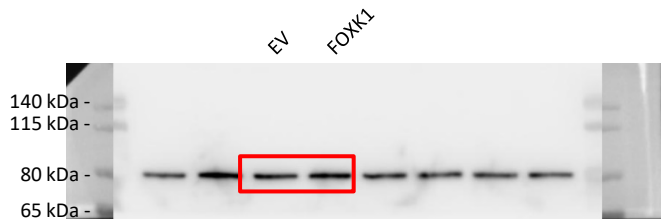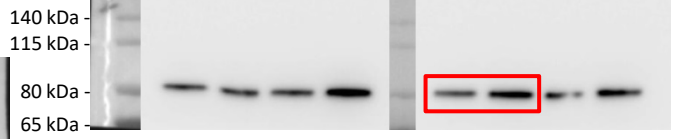

Cyc B

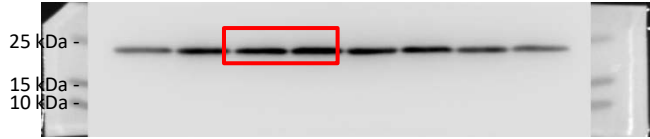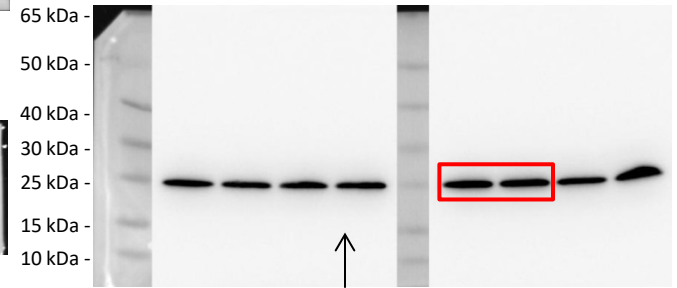

Membrane was stripped and used for Pdk4 WB

Pfkm

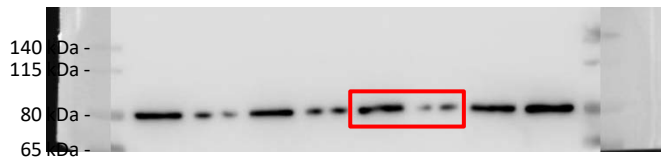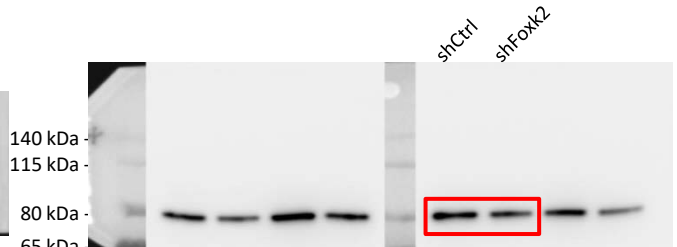

Cyc B

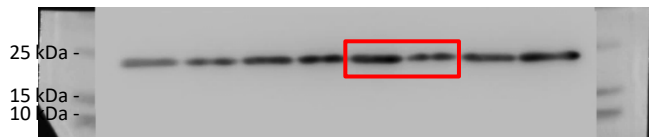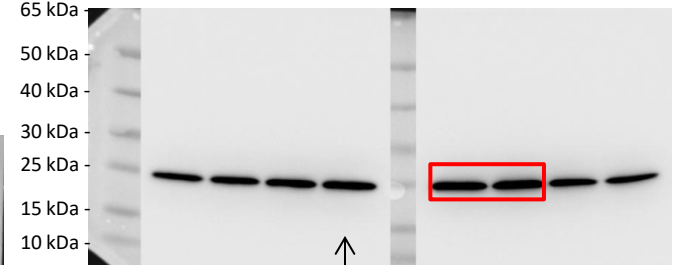

Membrane was stripped and used for Pdk4 WB

# Extended Data Figure 5c

Blot image is merged with molecular weight

Pkm-M2

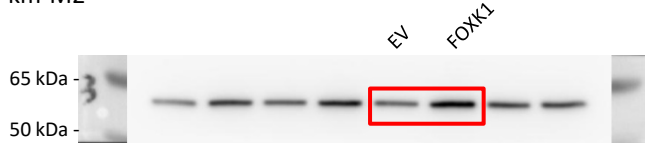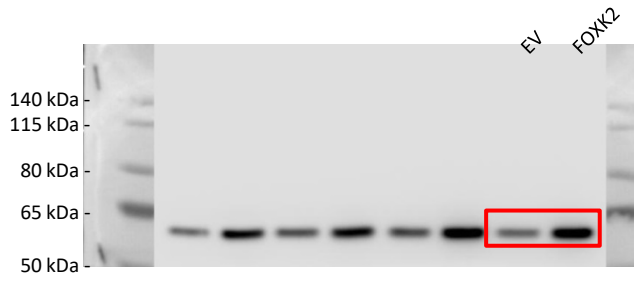

Cyc B

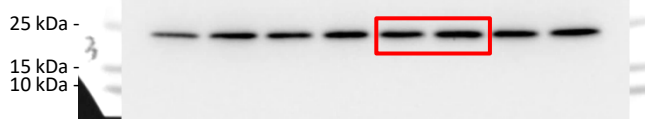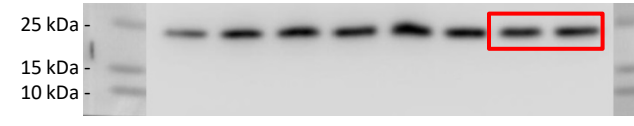

Pkm-M2

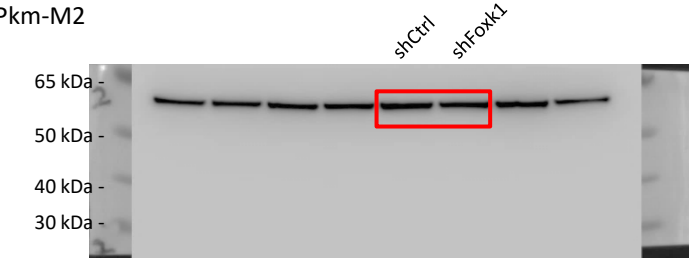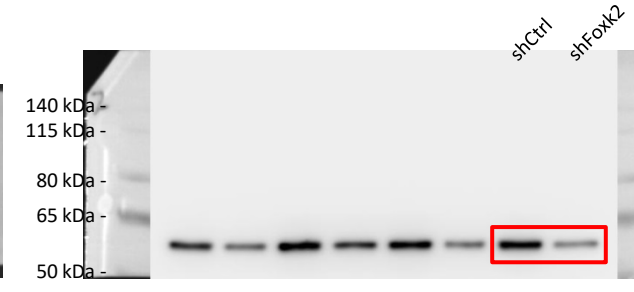

Cyc B

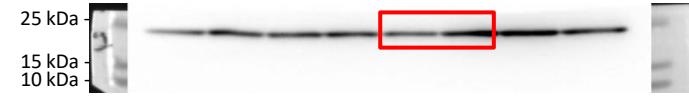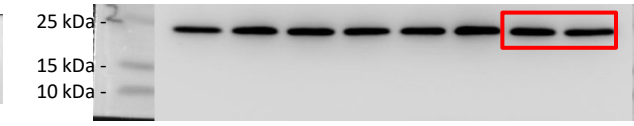

# Extended Data Figure 5d

Blot image is merged with molecular weight

Aldoa

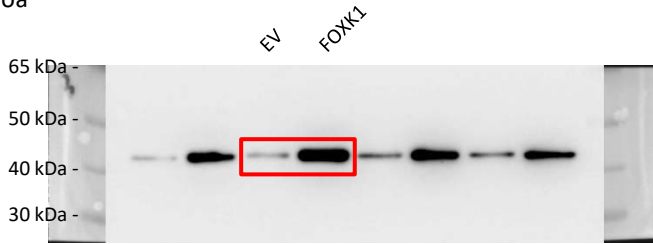

Cyc B

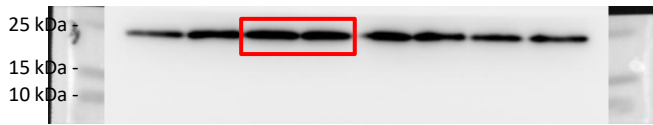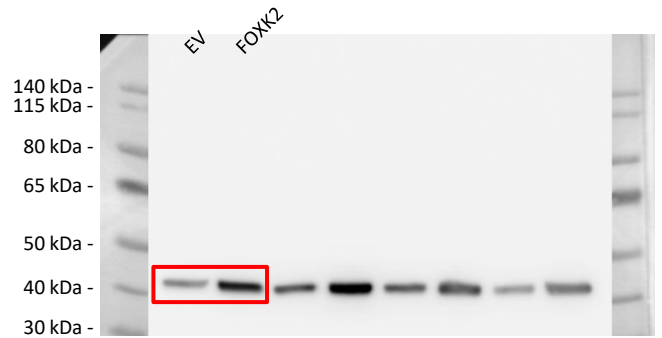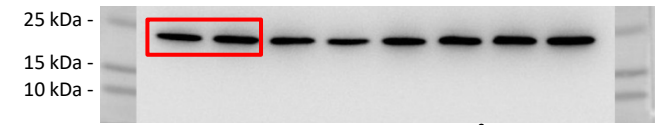

Aldoa

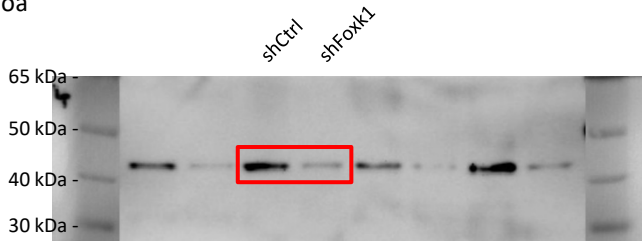

Cyc B

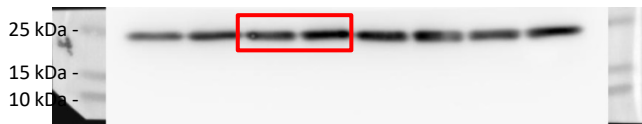

shCtrl shFoxk2

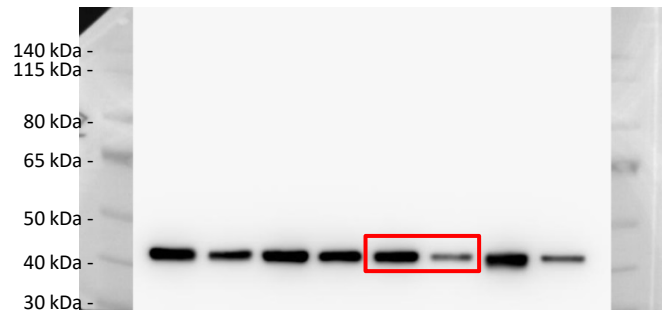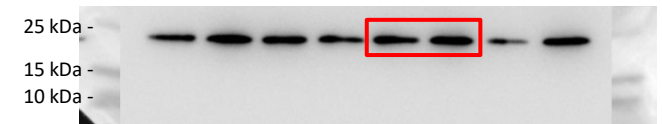

# Extended Data Figure 5e

Blot image is merged with molecular weight

Ldha

EV FOXK1

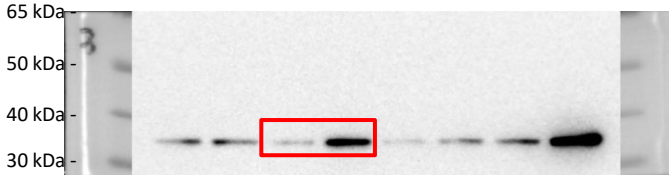

EV FOXK2

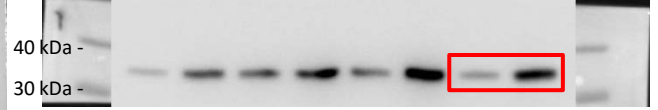

Cyc B

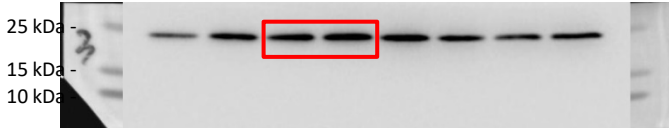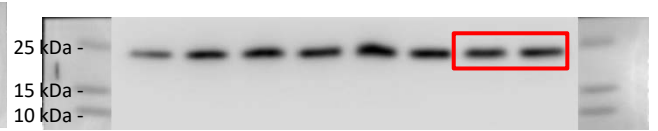

Ldha

shCtrl shFoxk1

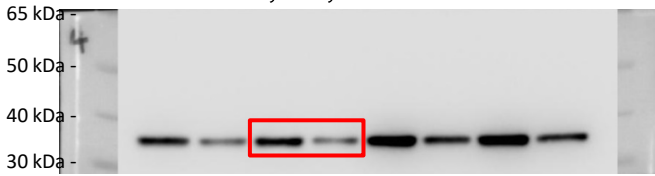

shCtrl shFoxk2

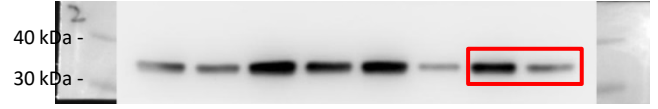

Cyc B

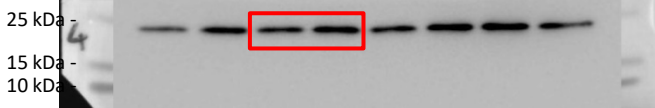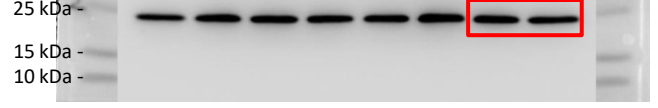

# Extended Data Figure 5f

Blot image is merged with molecular weight

Mct1

EV FOXK1

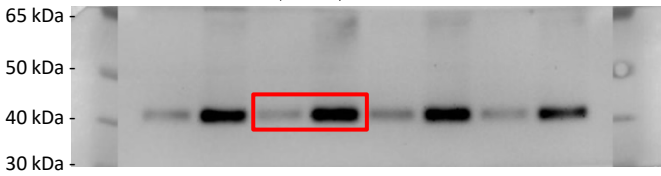

EV FOXK2

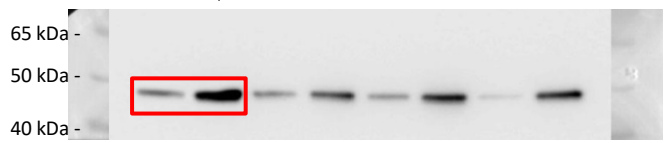

Cyc B

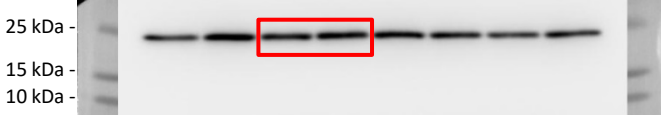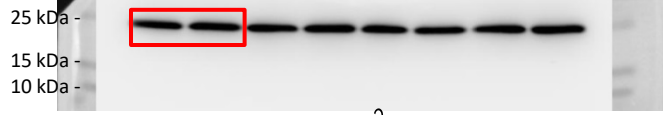

Mct1

shCtrl shFoxk1

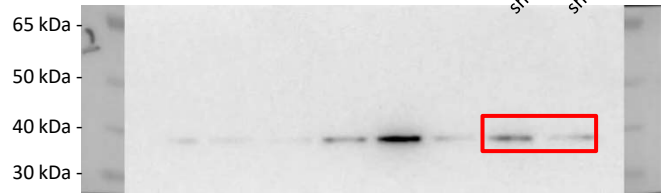

shCtrl shFoxk2

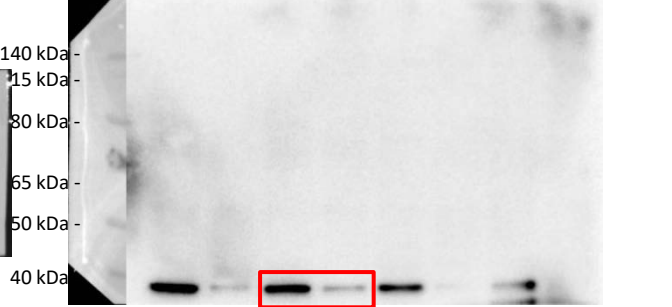

Cyc B

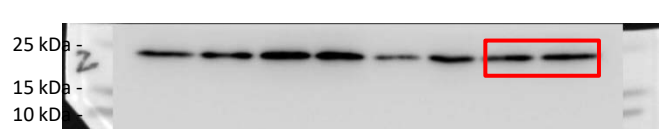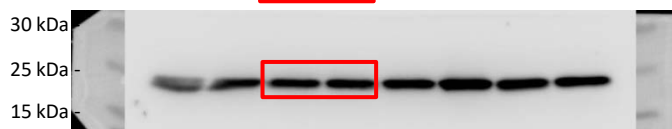

# Extended Data Figure 5g

Blot image is merged with molecular weight

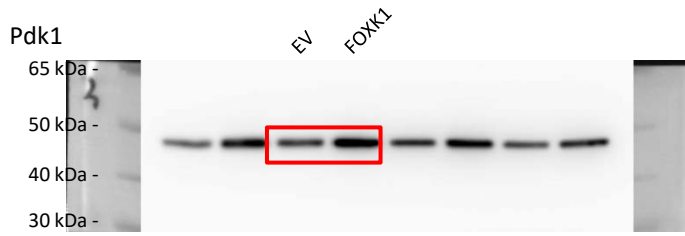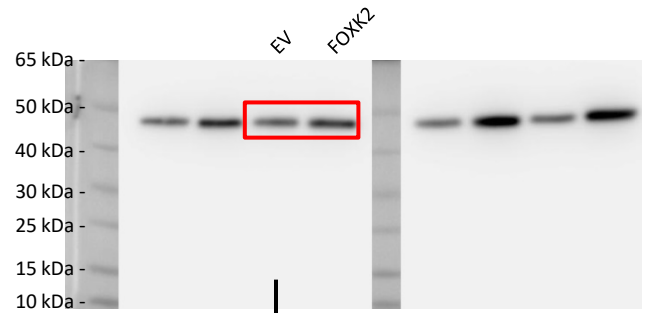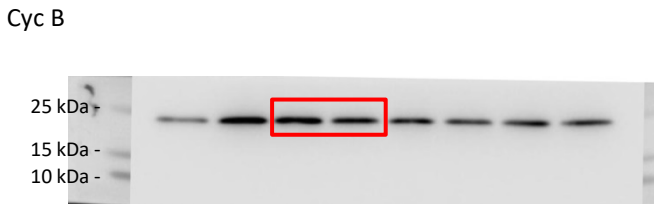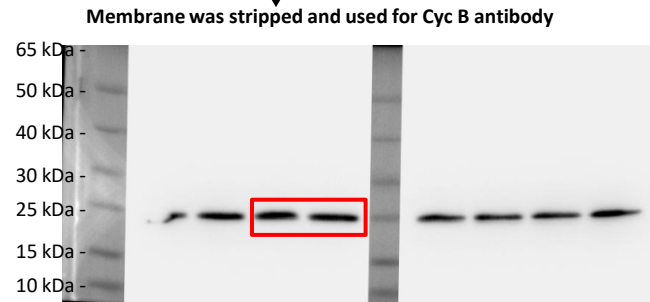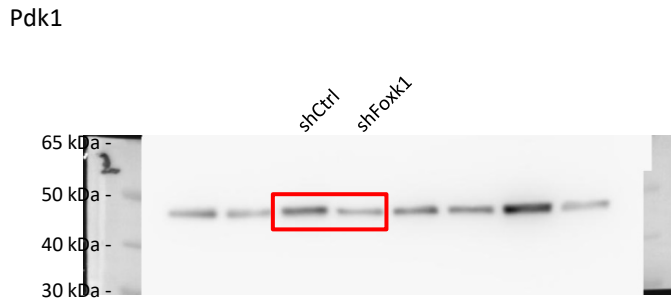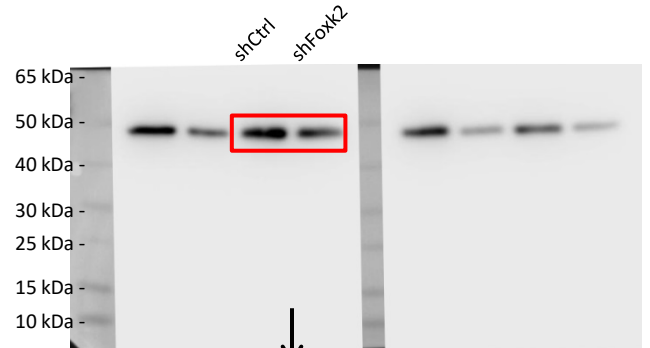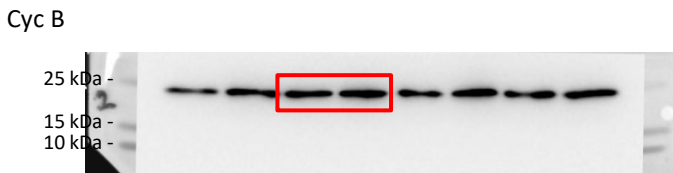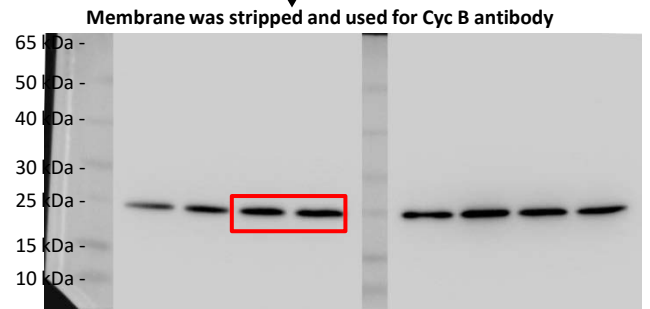



# Extended Data Figure 5h

Blot image is merged with molecular weight

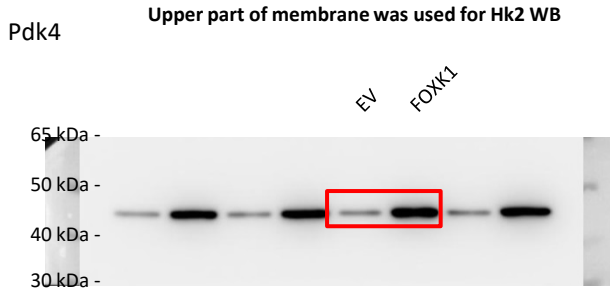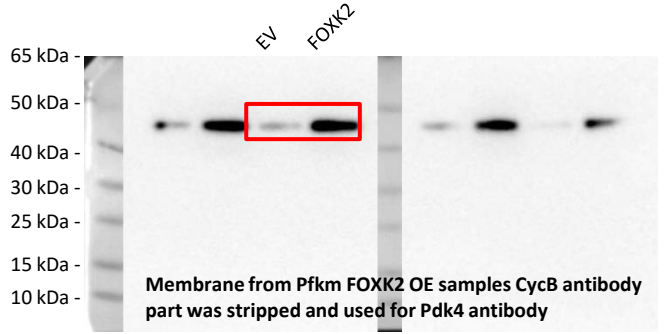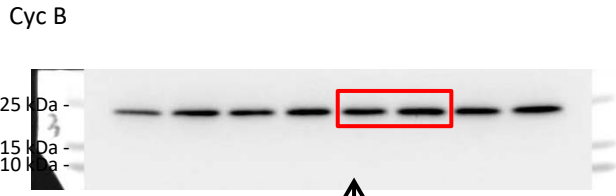

Same blot from Hk2 WB

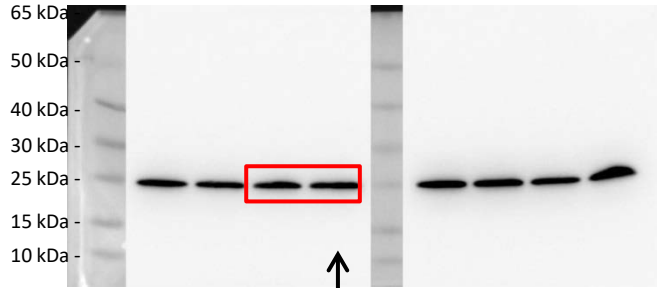

Same blot from Pfk WB

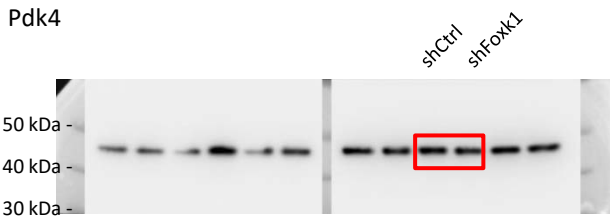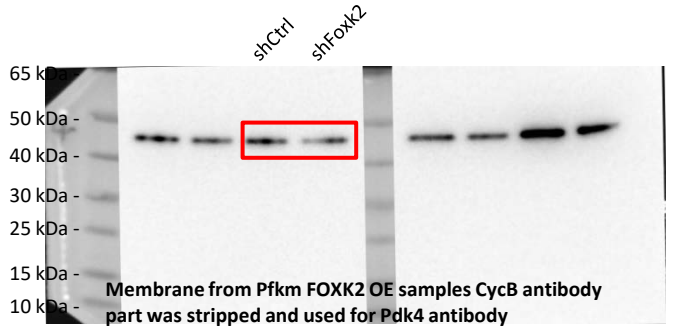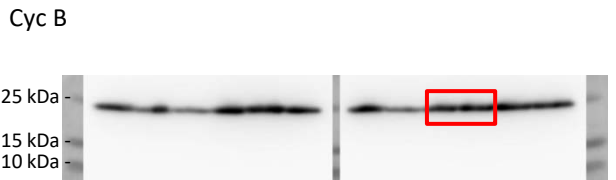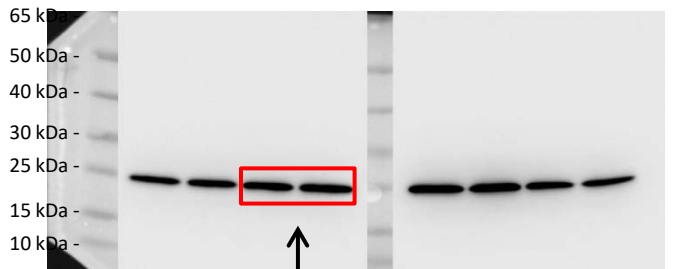

Same blot from Pfk WB

## Extended Data Figure 5i

Blot image is merged with molecular weight

Pdp1

EV FOXK1

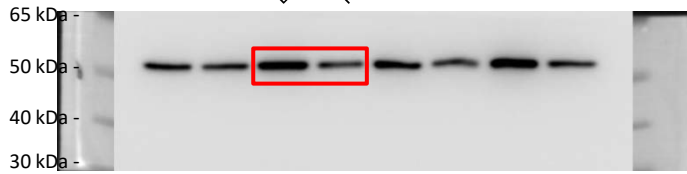

EV FOXK2

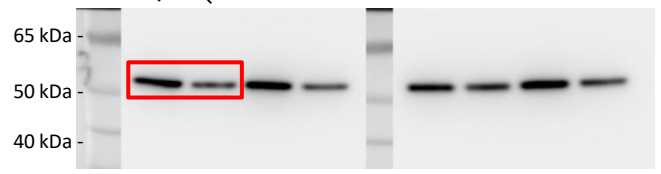

Cyc B

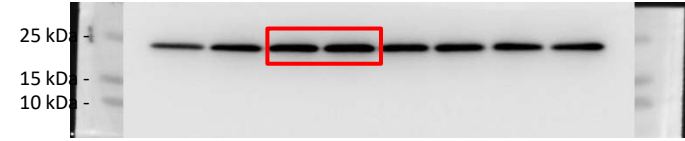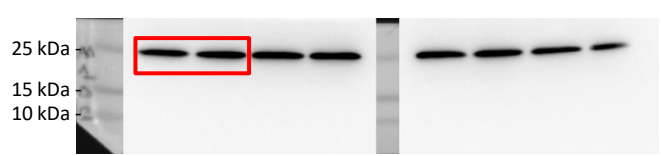

Pdp1

shCtrl shFoxk1

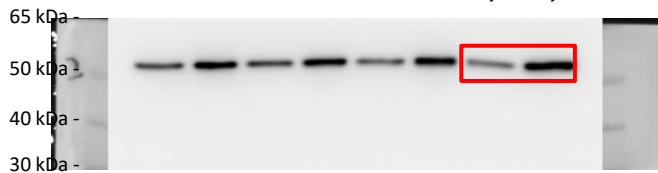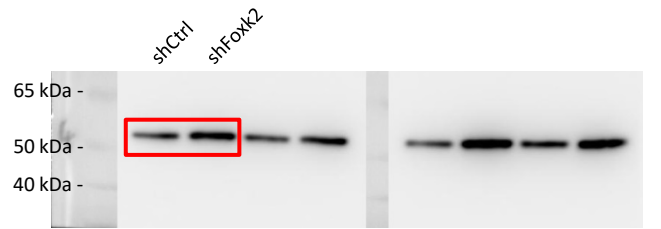

Cyc B

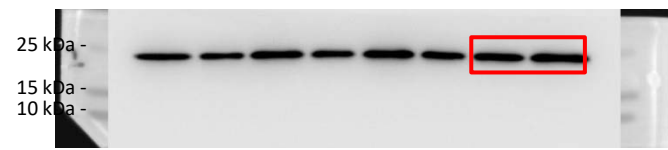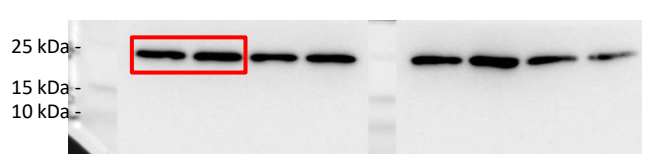

## Extended Data Figure 5j

Blot image is merged with molecular weight

Glud1

EV FOXK1

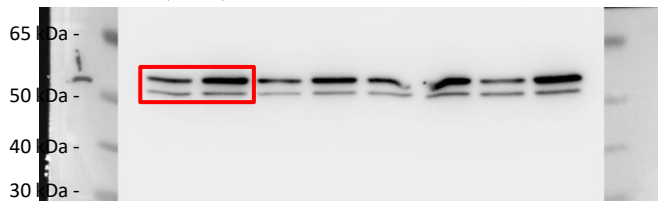

EV FOXK2

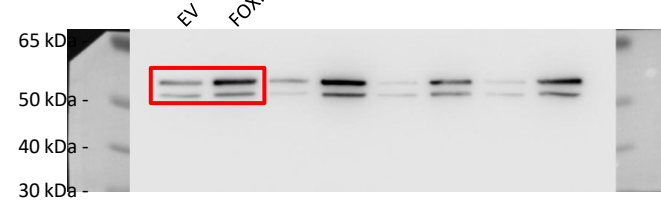

Cyc B

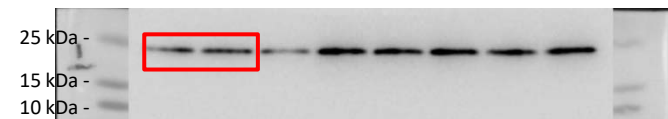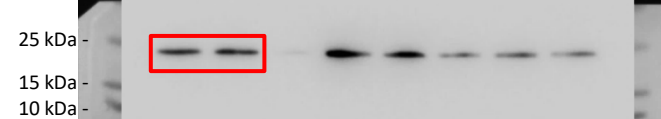

Glud1

shCtrl shFoxk1

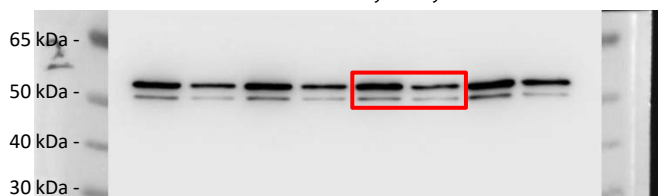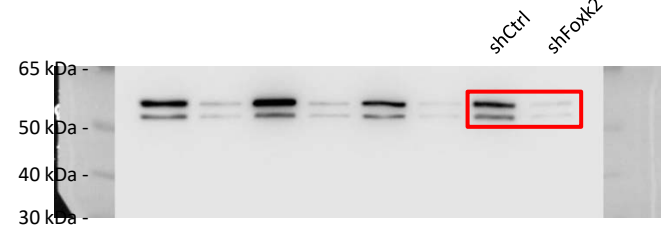

Cyc B

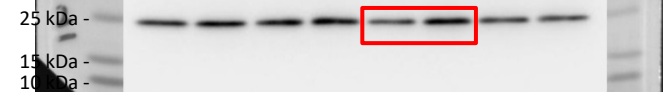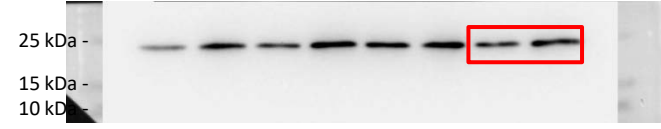

# Extended Data Figure 5k

Blot image is merged with molecular weight

pSer<sup>293</sup>

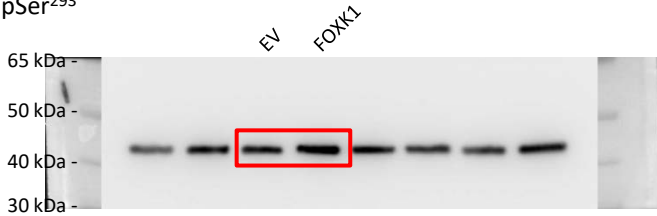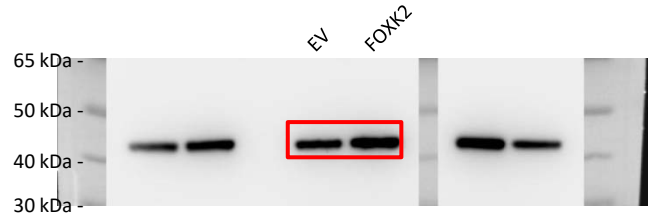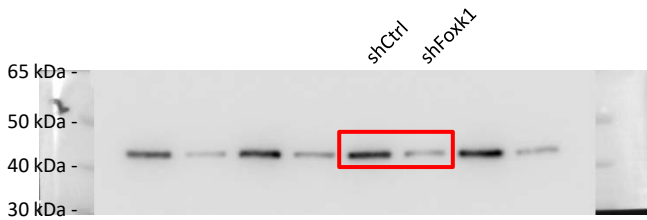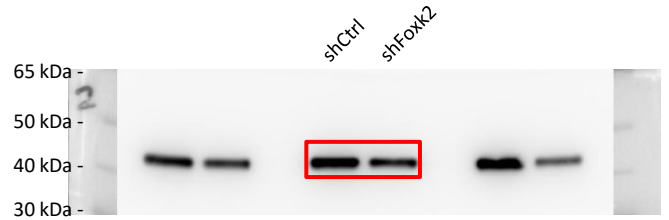

pSer<sup>232</sup>

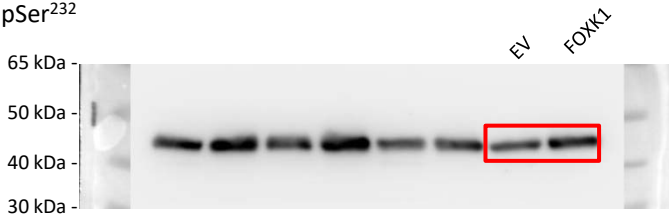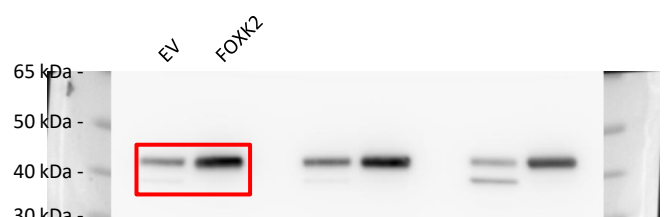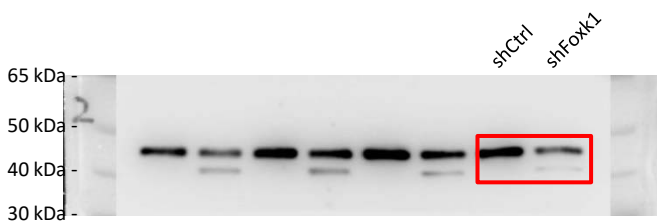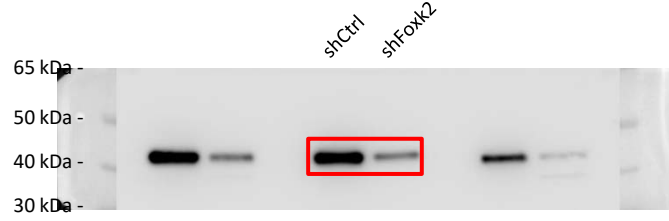

pSer<sup>300</sup>

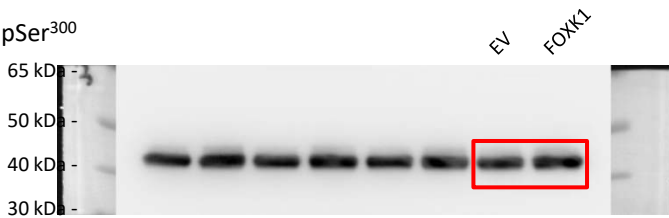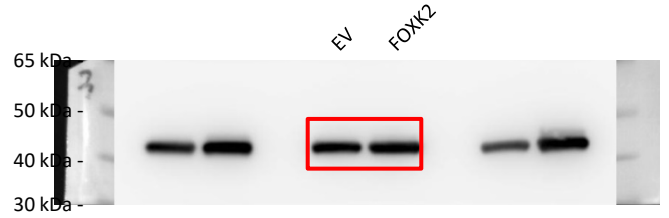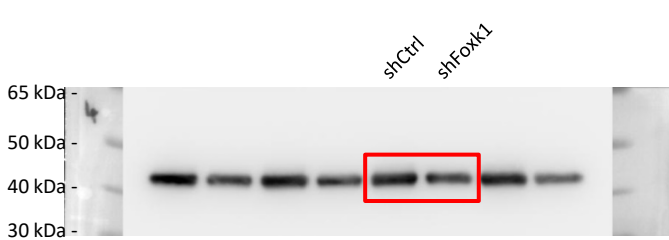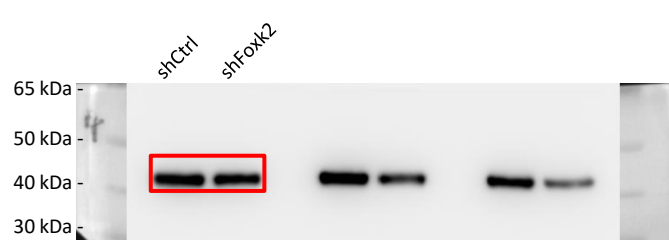

# Extended Data Figure 5k

Silver staining after PDH complex IP

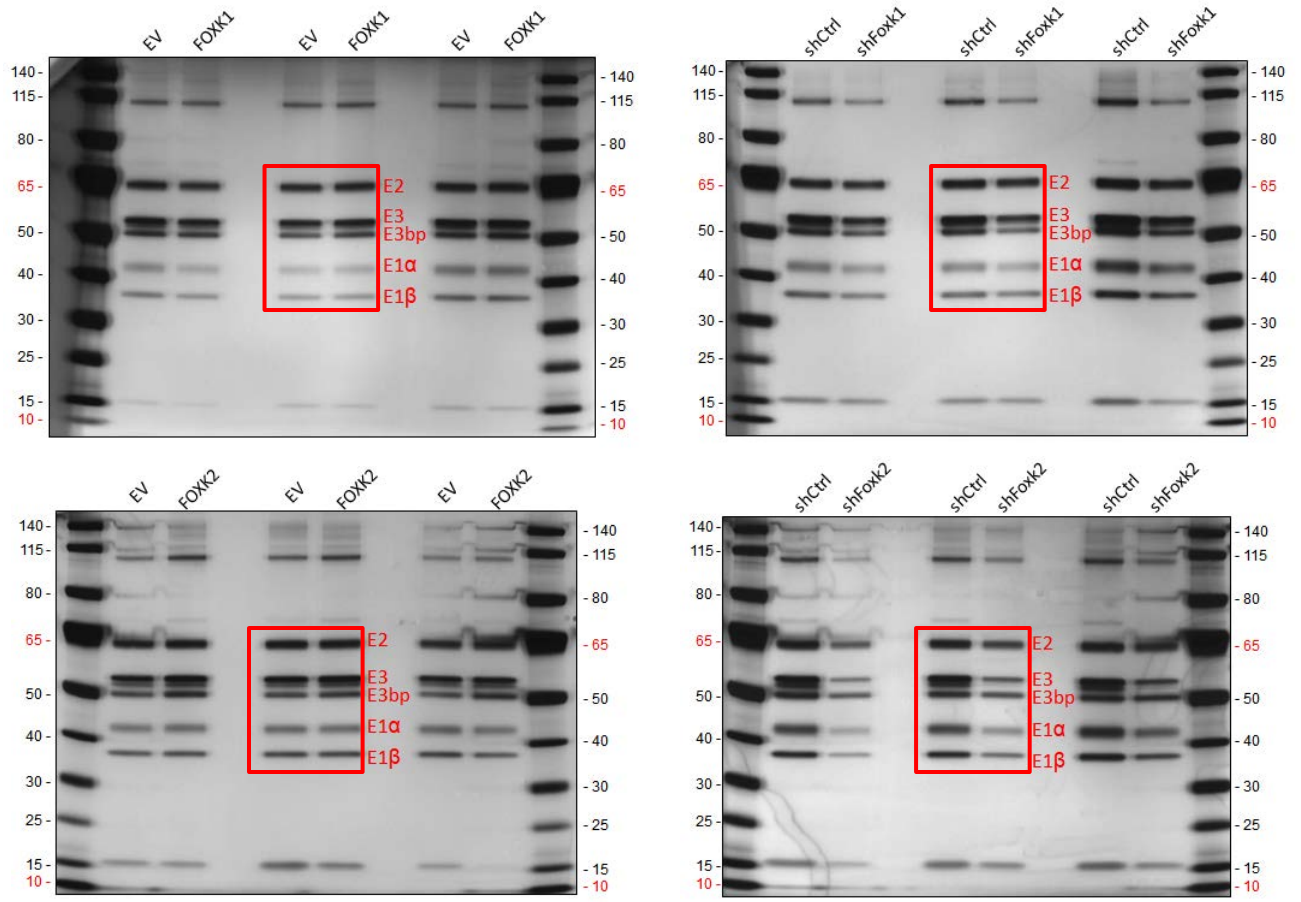

Supplement: 41586_2019_900_MOESM3_ESM.pdf [file 41586_2019_900_MOESM3_ESM.pdf]
