# Supplementary material for: FOXK1 and FOXK2 regulate aerobic glycolysis
Source: Springer Nature journal article supplement (doi:10.1038/s41586-019-0900-5), 2019-01-30
Supplement: 41586_2019_900_MOESM1_ESM.pdf [file 41586_2019_900_MOESM1_ESM.pdf]

In the format provided by the authors and unedited.

# FOXK1 and FOXK2 regulate aerobic glycolysis

Valentina Sukonina<sup>1,8</sup>, Haixia Ma<sup>1,8</sup>, Wei Zhang<sup>1</sup>, Stefano Bartesaghi<sup>2</sup>, Santhilal Subhash<sup>1</sup>, Mikael Heglind<sup>1</sup>, Håvard Foyen<sup>3</sup>, Matthias J. Betz<sup>1,7</sup>, Daniel Nilsson<sup>1</sup>, Martin E. Lidell<sup>1</sup>, Jennifer Naumann<sup>4,5</sup>, Saskia Haufs-Brusberg<sup>4,5</sup>, Henrik Palmgren<sup>2</sup>, Tanmoy Mondal<sup>1</sup>, Muheeb Beg<sup>1</sup>, Mark P. Jedrychowski<sup>6</sup>, Kjetil Taskén<sup>3</sup>, Alexander Pfeifer<sup>4,5</sup>, Xiao-Rong Peng<sup>2</sup>, Chandrasekhar Kanduri<sup>1</sup> & Sven Enerbäck<sup>1\*</sup>

---

<sup>1</sup>Department of Medical Biochemistry and Cell Biology, Institute of Biomedicine, University of Gothenburg, Gothenburg, Sweden. <sup>2</sup>Diabetes Bioscience, Cardiovascular, Renal and Metabolism, IMED Biotech Unit, AstraZenca, Gothenburg, Sweden. <sup>3</sup>Department of Cancer Immunology, Institute of Cancer Research, Oslo University Hospital, Oslo, Norway. <sup>4</sup>Institute of Pharmacology and Toxicology, University Hospital Bonn, Bonn, Germany. <sup>5</sup>PharmaCenter, University of Bonn, Bonn, Germany. <sup>6</sup>Department of Cell Biology, Harvard University Medical School, Boston, MA, USA. <sup>7</sup>Present address: Department of Endocrinology, University Hospital Basel, Basel, Switzerland. <sup>8</sup>These authors contributed equally: Valentina Sukonina, Haixia Ma.  
\*e-mail: [sven.enerback@medgen.gu.se](mailto:sven.enerback@medgen.gu.se)

## Supplementary note 1

We would like to point out that although frequently used as in vitro models for muscle metabolism it is well recognized that even though L6 and C2C12 cell lines use Glut4 as the principal glucose carrier, they are much less insulin-responsive than 3T3-L1 adipocytes, which also depend on Glut4 for insulin-stimulated glucose uptake<sup>56,57</sup>. This explains why the glucose uptake in response to FOXK1 and FOXK2 are relatively smaller in C2C12 and L6 as compared with 3T3-L1 adipocytes. However, we found a significant increase in glucose uptake under non-insulin stimulated conditions in L6 (Fig. 1h) and C2C12 myocytes with induced expression of FOXK1 and FOXK2 (Extended Data Fig. 2e), there is also a tendency toward increased insulin-stimulated glucose uptake e.g. at day 5 (Extended Data Fig. 2e).

- 56 Tortorella, L. L. & Pilch, P. F. C2C12 myocytes lack an insulin-responsive vesicular compartment despite dexamethasone-induced GLUT4 expression. *Am J Physiol Endocrinol Metab* **283**, E514-524, doi:10.1152/ajpendo.00092.2002 (2002).
- 57 Ueyama, A., Yaworsky, K. L., Wang, Q., Ebina, Y. & Klip, A. GLUT-4myc ectopic expression in L6 myoblasts generates a GLUT-4-specific pool conferring insulin sensitivity. *Am J Physiol* **277**, E572-578 (1999).
